# Supplementary material for: Alteration in Gut Microbiota Associated with Zinc Deficiency in School-Age Children
Source: MDPI journal article supplement (doi:10.3390/nu14142895), 2022-07-14
Supplement: s1 [file s1]

## **Supplementary Text: Questionnaire on the Nutritional Status of School-age Children**

### **Part I: Basic Information about Children**

Instructions: Please type "√" before the option, or fill in after the colon.

1. Name:
2. Grade:
3. Class:
4. Sex: (1) Male (2) Female
5. Date of birth:
6. Home address:
7. Contact Details for the family:
8. Nationality: (1) Han (2) Hui (3) Dongxiang (4) other
9. Total family size:
10. Number of siblings: (1) 0 (2) 1 (3) 2 (4) 3 (5) 4 (6) 5 or more
11. Father's education level: (1) Elementary school and below (2) Junior high school  
(3) High school (4) Bachelor degree and above
12. Mother's education level: (1) Elementary school and below (2) Junior high school  
(3) High school (4) Bachelor degree and above
13. Father's Occupation:
14. Mother's Occupation:
15. Total annual household income (RMB): (1) Below 10000 (2) 10000-19999 (3)

20000-29999    (4) 30000-39999    (5) Above 40000

## **Part II: The Physical Condition of the Children**

Instructions: Please type "✓" before the option, or fill in the horizontal line.

1. Has the child had symptoms of decreased eating in the last 3 months?  
(1) Yes    (2) No
2. Has the child had symptoms of anorexia in the last 3 months?  
(1) Yes    (2) No
3. Has the child had symptoms of a partial eclipse in the last three months?  
(1) Yes    (2) No
4. Has the child had a fever in the last three months?  
(1) Yes    (2) No
5. In the past three months, has the child had any respiratory symptoms such as cough, runny nose, nasal congestion, and sore throat?  
(1) Yes    (2) No
6. In the past three months, has the child had any gastrointestinal symptoms such as abdominal pain, constipation, and diarrhea?  
(1) Yes    (2) No
7. Has the child had symptoms of nail biting in the last three months?  
(1) Yes    (2) No
8. Has the child had symptoms of eating hair in the last three months?  
(1) Yes    (2) No

9. Has the child had symptoms of eating wall ash, soil, or gravel in the last three months?

(1) Yes (2) No

10. Has the child had difficulty in concentration in the last three months?

(1) Yes (2) No

11. Has the child had symptoms of memory loss in the last three months?

(1) Yes (2) No

12. Has the child had any other symptoms in the last three months? If yes, please write it down.

(1) Yes, \_\_\_\_\_ (2) No

13. Has the child taken any medication in the last three months? If yes, please write it down.

(1) Yes, \_\_\_\_\_ (2) No

14. Has the child taken nutritional supplements in the last three months? If yes, please write it down.

(1) Yes, \_\_\_\_\_ (2) No

### Part III: 24-Hour Dietary Recalls of 3 Consecutive Days

Collect the information on food consumption using the 24-h dietary recall method over three consecutive days (including two weekdays and one weekend day). For children younger than 12 years, the mother or caregiver was asked to report all foods the children consumed. Children over 12 years old recalled food consumption independently.

| Date | Time | Dining place | Food | Method of cooking | Cooking Materials | Material weight (g) | Intake (g) |
|------|------|--------------|------|-------------------|-------------------|---------------------|------------|
|      |      |              |      |                   |                   |                     |            |
|      |      |              |      |                   |                   |                     |            |

[illegible]





[illegible]

Supplementary Table S1. Average intake versus recommended intake for nine food groups.

| <b>Food group</b>          | <b>Average intake (g)</b> | <b>Recommended nutrient intake<sup>1</sup> (g)</b> |
|----------------------------|---------------------------|----------------------------------------------------|
| Cereals and potatoes       | 363.22±8.12               | 250~400                                            |
| Vegetables                 | 92.50±5.60                | 300~500                                            |
| Fruit                      | 74.35±6.31                | 200~350                                            |
| Livestock and poultry meat | 29.11±2.24                | 40~75                                              |
| Aquatic products           | 1.36±0.76                 | 40~75                                              |
| Egg                        | 55.38±2.59                | 40~50                                              |
| Milk and milk products     | 127.55±3.76               | 300                                                |
| Soybeans and nuts          | 3.83±0.18                 | 25~35                                              |
| Oil                        | 18.11±0.88                | 25~30                                              |

Food intakes are expressed as mean ± SEM. <sup>1</sup>Recommended nutrient intake are adapted from the Dietary Guidelines for Chinese Residents (2016).



Supplementary Table S2. The daily consumption of food groups and nutrients between ZD group and CK group.

|                            | <b>ZD (n=57)</b> | <b>CK (n=120)</b> | <b>Total<br/>(n=177)</b> | <b><i>p</i></b> |
|----------------------------|------------------|-------------------|--------------------------|-----------------|
| <b>Food groups</b>         |                  |                   |                          |                 |
| Cereals and potatoes       | 366.77±13.89     | 361.54±10.03      | 363.22±8.12              | 0.764           |
| Vegetables                 | 94.86±9.91       | 91.39±6.81        | 92.50±5.60               | 0.773           |
| Fruit                      | 81.89±11.08      | 70.77±7.69        | 74.35±6.31               | 0.412           |
| Livestock and poultry meat | 27.10±3.95       | 30.07±2.74        | 29.11±2.24               | 0.539           |
| Aquatic products           | 2.66±2.20        | 0.76±4.48         | 1.36±0.76                | 0.398           |
| Egg                        | 57.55±3.84       | 54.35±3.37        | 55.38±2.59               | 0.566           |
| Milk and milk products     | 132.94±54.19     | 125.13±4.37       | 127.55±3.76              | 0.333           |
| Soybeans and nuts          | 4.48±0.43        | 3.54±0.16         | 3.83±0.18                | 0.042*          |
| Oil                        | 16.85±1.16       | 18.69±1.17        | 18.11±0.88               | 0.327           |
| <b>Nutrients</b>           |                  |                   |                          |                 |
| Energy                     | 1316.65±50.72    | 1322.23±34.50     | 1320.43±28.45            | 0.927           |
| Protein                    | 41.23±1.75       | 40.43±1.14        | 40.69±0.95               | 0.699           |
| Fat                        | 45.02±1.82       | 47.05±1.59        | 46.40±1.23               | 0.444           |
| Carbohydrate               | 186.76±8.44      | 184.28±5.13       | 185.08±4.40              | 0.793           |
| Dietary Fiber              | 6.33±0.37        | 5.90±0.18         | 6.04±0.17                | 0.310           |
| Vitamin A                  | 265.49±13.50     | 260.41±9.11       | 262.05±7.54              | 0.754           |

|                        |                |                |                |       |
|------------------------|----------------|----------------|----------------|-------|
| Vitamin D              | 1.25±0.11      | 1.22±0.19      | 1.23±0.13      | 0.931 |
| Vitamin E              | 34.01±3.08     | 35.61±1.98     | 35.10±1.66     | 0.655 |
| Vitamin B <sub>1</sub> | 0.64±0.04      | 0.62±0.02      | 0.62±0.02      | 0.587 |
| Vitamin B <sub>2</sub> | 0.60±0.03      | 0.69±0.14      | 0.66±0.09      | 0.654 |
| Vitamin C              | 30.71±3.14     | 34.51±2.27     | 33.29±1.84     | 0.336 |
| Niacin                 | 6.59±0.35      | 6.54±0.25      | 6.56±0.20      | 0.897 |
| Calcium                | 299.56±10.95   | 329.68±36.16   | 319.98±24.75   | 0.571 |
| Phosphorus             | 667.09±26.09   | 651.79±16.39   | 656.72±13.90   | 0.609 |
| Potassium              | 1189.02±57.58  | 1189.66±48.48  | 1189.46±37.65  | 0.994 |
| Sodium                 | 3168.20±225.52 | 3379.00±158.14 | 3311.11±129.37 | 0.448 |
| Magnesium              | 171.23±8.18    | 169.71±4.74    | 170.20±4.14    | 0.864 |
| Iron                   | 11.94±0.59     | 12.11±0.39     | 12.06±0.33     | 0.796 |
| Zinc                   | 4.87±0.23      | 4.84±0.14      | 4.85±0.12      | 0.924 |
| Selenium               | 32.24±1.24     | 31.88±0.87     | 32.00±0.71     | 0.814 |

---

The intake of food and nutrients are expressed as mean ± SEM. Nutrient units: energy in kcal, protein, fat, carbohydrate, Dietary Fiber and food groups in g, vitamin A an equivalent in µg retinol, selenium and vitamin D in µg, all other nutrients in mg. *p* value was calculated by student's *t* test. \**p* <0.05.

Supplementary Table S3. Nutrient adequacy ratio of nutrients among participants by zinc statue groups.

| NARs                   | Overall |       | ZD    |       | CK    |       | <i>p</i> |
|------------------------|---------|-------|-------|-------|-------|-------|----------|
|                        | Mean    | SEM   | Mean  | SEM   | Mean  | SEM   |          |
| Vitamin A              | 0.523   | 0.016 | 0.526 | 0.026 | 0.522 | 0.019 | 0.888    |
| Vitamin D              | 0.116   | 0.007 | 0.125 | 0.011 | 0.111 | 0.009 | 0.316    |
| Vitamin E              | 0.990   | 0.006 | 0.994 | 0.006 | 0.988 | 0.008 | 0.630    |
| Vitamin B <sub>1</sub> | 0.611   | 0.016 | 0.620 | 0.031 | 0.607 | 0.019 | 0.729    |
| Vitamin B <sub>2</sub> | 0.574   | 0.014 | 0.579 | 0.025 | 0.571 | 0.017 | 0.803    |
| Vitamin C              | 0.466   | 0.022 | 0.440 | 0.036 | 0.478 | 0.027 | 0.412    |
| Niacin                 | 0.616   | 0.017 | 0.618 | 0.030 | 0.616 | 0.020 | 0.953    |
| Calcium                | 0.301   | 0.008 | 0.300 | 0.011 | 0.301 | 0.010 | 0.922    |
| Phosphorus             | 0.959   | 0.009 | 0.964 | 0.015 | 0.956 | 0.012 | 0.709    |
| Potassium              | 0.741   | 0.016 | 0.754 | 0.030 | 0.735 | 0.019 | 0.579    |
| Sodium                 | 0.990   | 0.005 | 0.995 | 0.004 | 0.989 | 0.008 | 0.601    |
| Magnesium              | 0.735   | 0.016 | 0.744 | 0.029 | 0.731 | 0.019 | 0.708    |
| Iron                   | 0.822   | 0.016 | 0.816 | 0.029 | 0.825 | 0.019 | 0.781    |
| Zinc                   | 0.664   | 0.015 | 0.675 | 0.028 | 0.659 | 0.018 | 0.620    |
| Selenium               | 0.759   | 0.015 | 0.778 | 0.025 | 0.750 | 0.019 | 0.390    |
| MAR                    | 0.658   | 0.011 | 0.661 | 0.019 | 0.656 | 0.013 | 0.801    |

NAR: Nutrient adequacy ratio. MAR: Mean adequacy ratio. SEM: Standard Error of Mean. *p* value was calculated by student's *t* test.

Supplementary Table S4. Characteristics of zinc deficiency and control children (n = 67).

|                            | <b>ZD (n=26)</b>      | <b>CK (n=41)</b>        | <b><i>p</i></b> |
|----------------------------|-----------------------|-------------------------|-----------------|
| Age, years (mean ± SEM)    | 8.16 ± 0.19           | 8.51 ± 0.28             | 0.312           |
| Sex (females, males)       | 15females,<br>11males | 25 females, 16<br>males | 0.789           |
| Dietary diversity score    | 5.77 ± 0.13           | 5.81 ± 0.09             | 0.775           |
| Z-score                    |                       |                         |                 |
| Median HAZ score           | -0.09                 | -0.69                   | 0.045*          |
| Median WAZ score           | -0.20                 | -0.53                   | 0.090           |
| Median BMIZ score          | -0.23                 | -0.42                   | 0.077           |
| Blood indices (mean ± SEM) |                       |                         |                 |
| Serum zinc (µg/dL)         | 19.11 ± 3.72          | 145.7 ± 5.83            | <0.001***       |
| IL-6 (pg/mL)               | 21.62 ± 2.06          | 17.82 ± 1.83            | 0.183           |
| TNF-α (pg/mL)              | 13.80 ± 0.50          | 7.85 ± 0.85             | <0.001***       |
| IL-1β (pg/mL)              | 24.66 ± 3.63          | 21.82 ± 2.71            | 0.526           |

\**p* <0.05, \*\*\**p* <0.001.

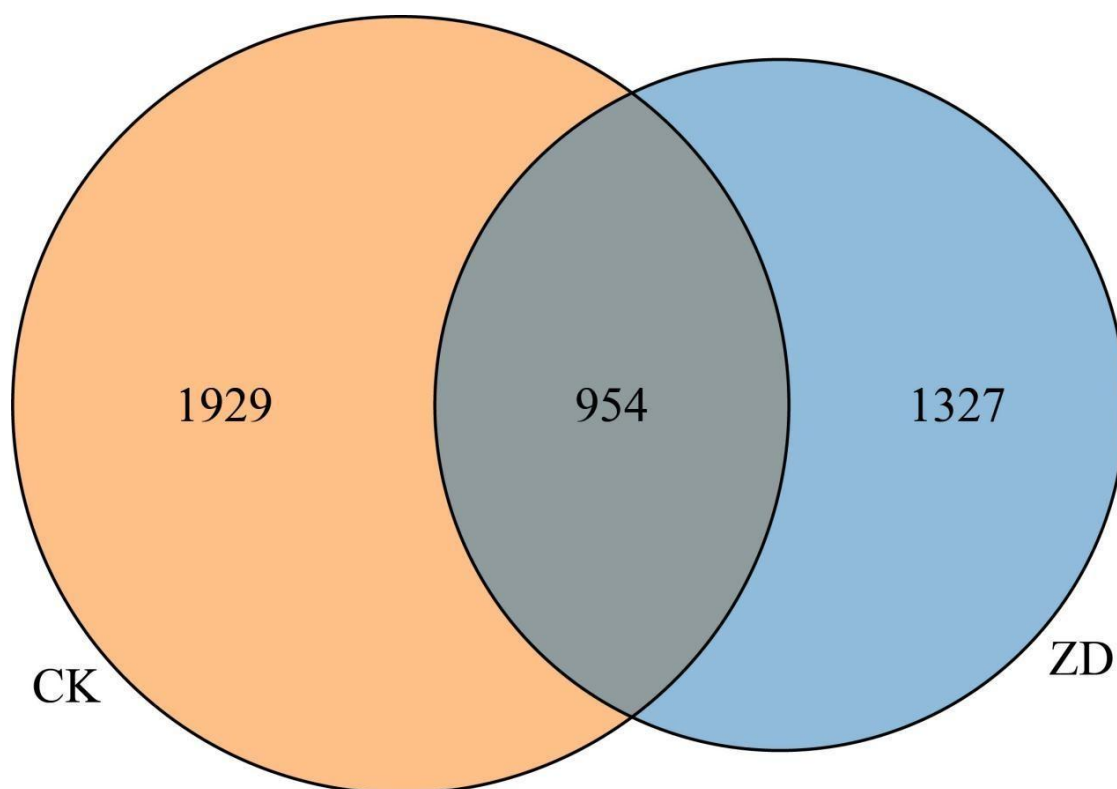

Supplementary Figure S1. Venn diagram of unique and shared ASVs (amplicon sequence variants) in ZD group and CK group.

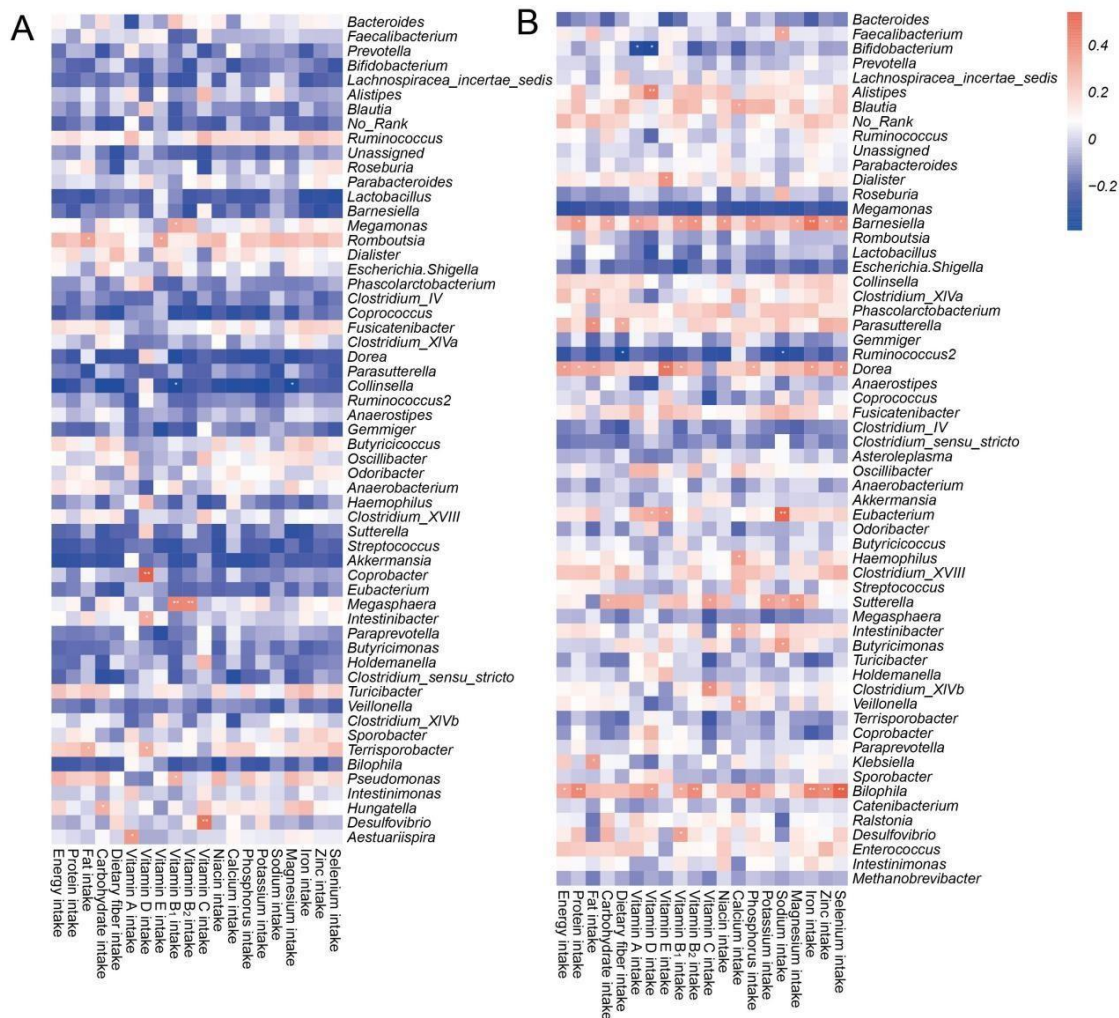

Supplementary Figure S2. The relationship between genus-level bacterial taxa and nutritional profile in (A)ZD group and (B)CK group. Only those genera with relative abundance >0.05% are shown. Two colors mean positive correlation and negative correlation, respectively.

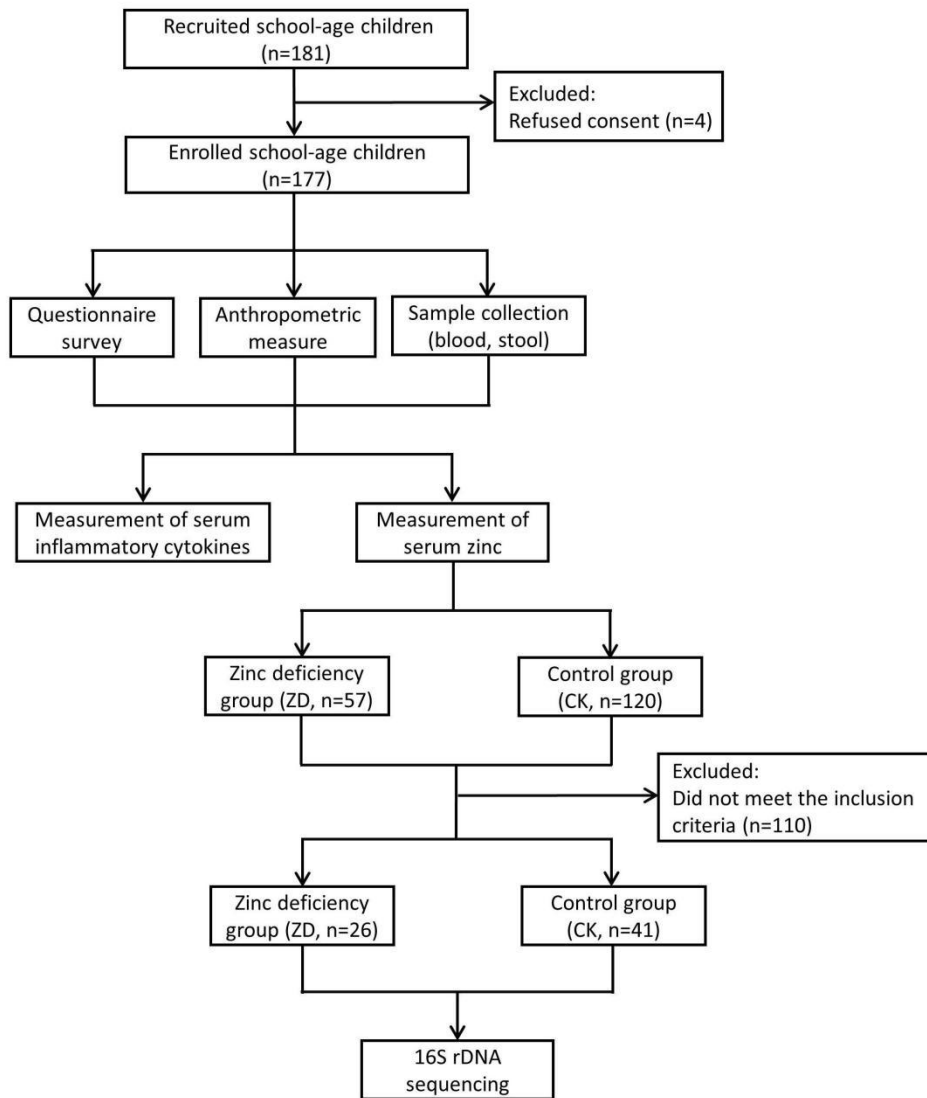

Supplementary Figure S3. Graphical diagram of overall plan in this study.
